# Supplementary material for: Development and Validation of an Interpretable Machine Learning Model for Predicting 5-year Major Adverse Cardiovascular Events in Patients with Coronary Artery Disease
Source: Research Square preprint supplement (doi:10.21203/rs.3.rs-8616117/v1), 2026-02-11
Supplement: Supplementary file 1 [file a2b4e517da660a0872448822.docx]

**Supplementary material**


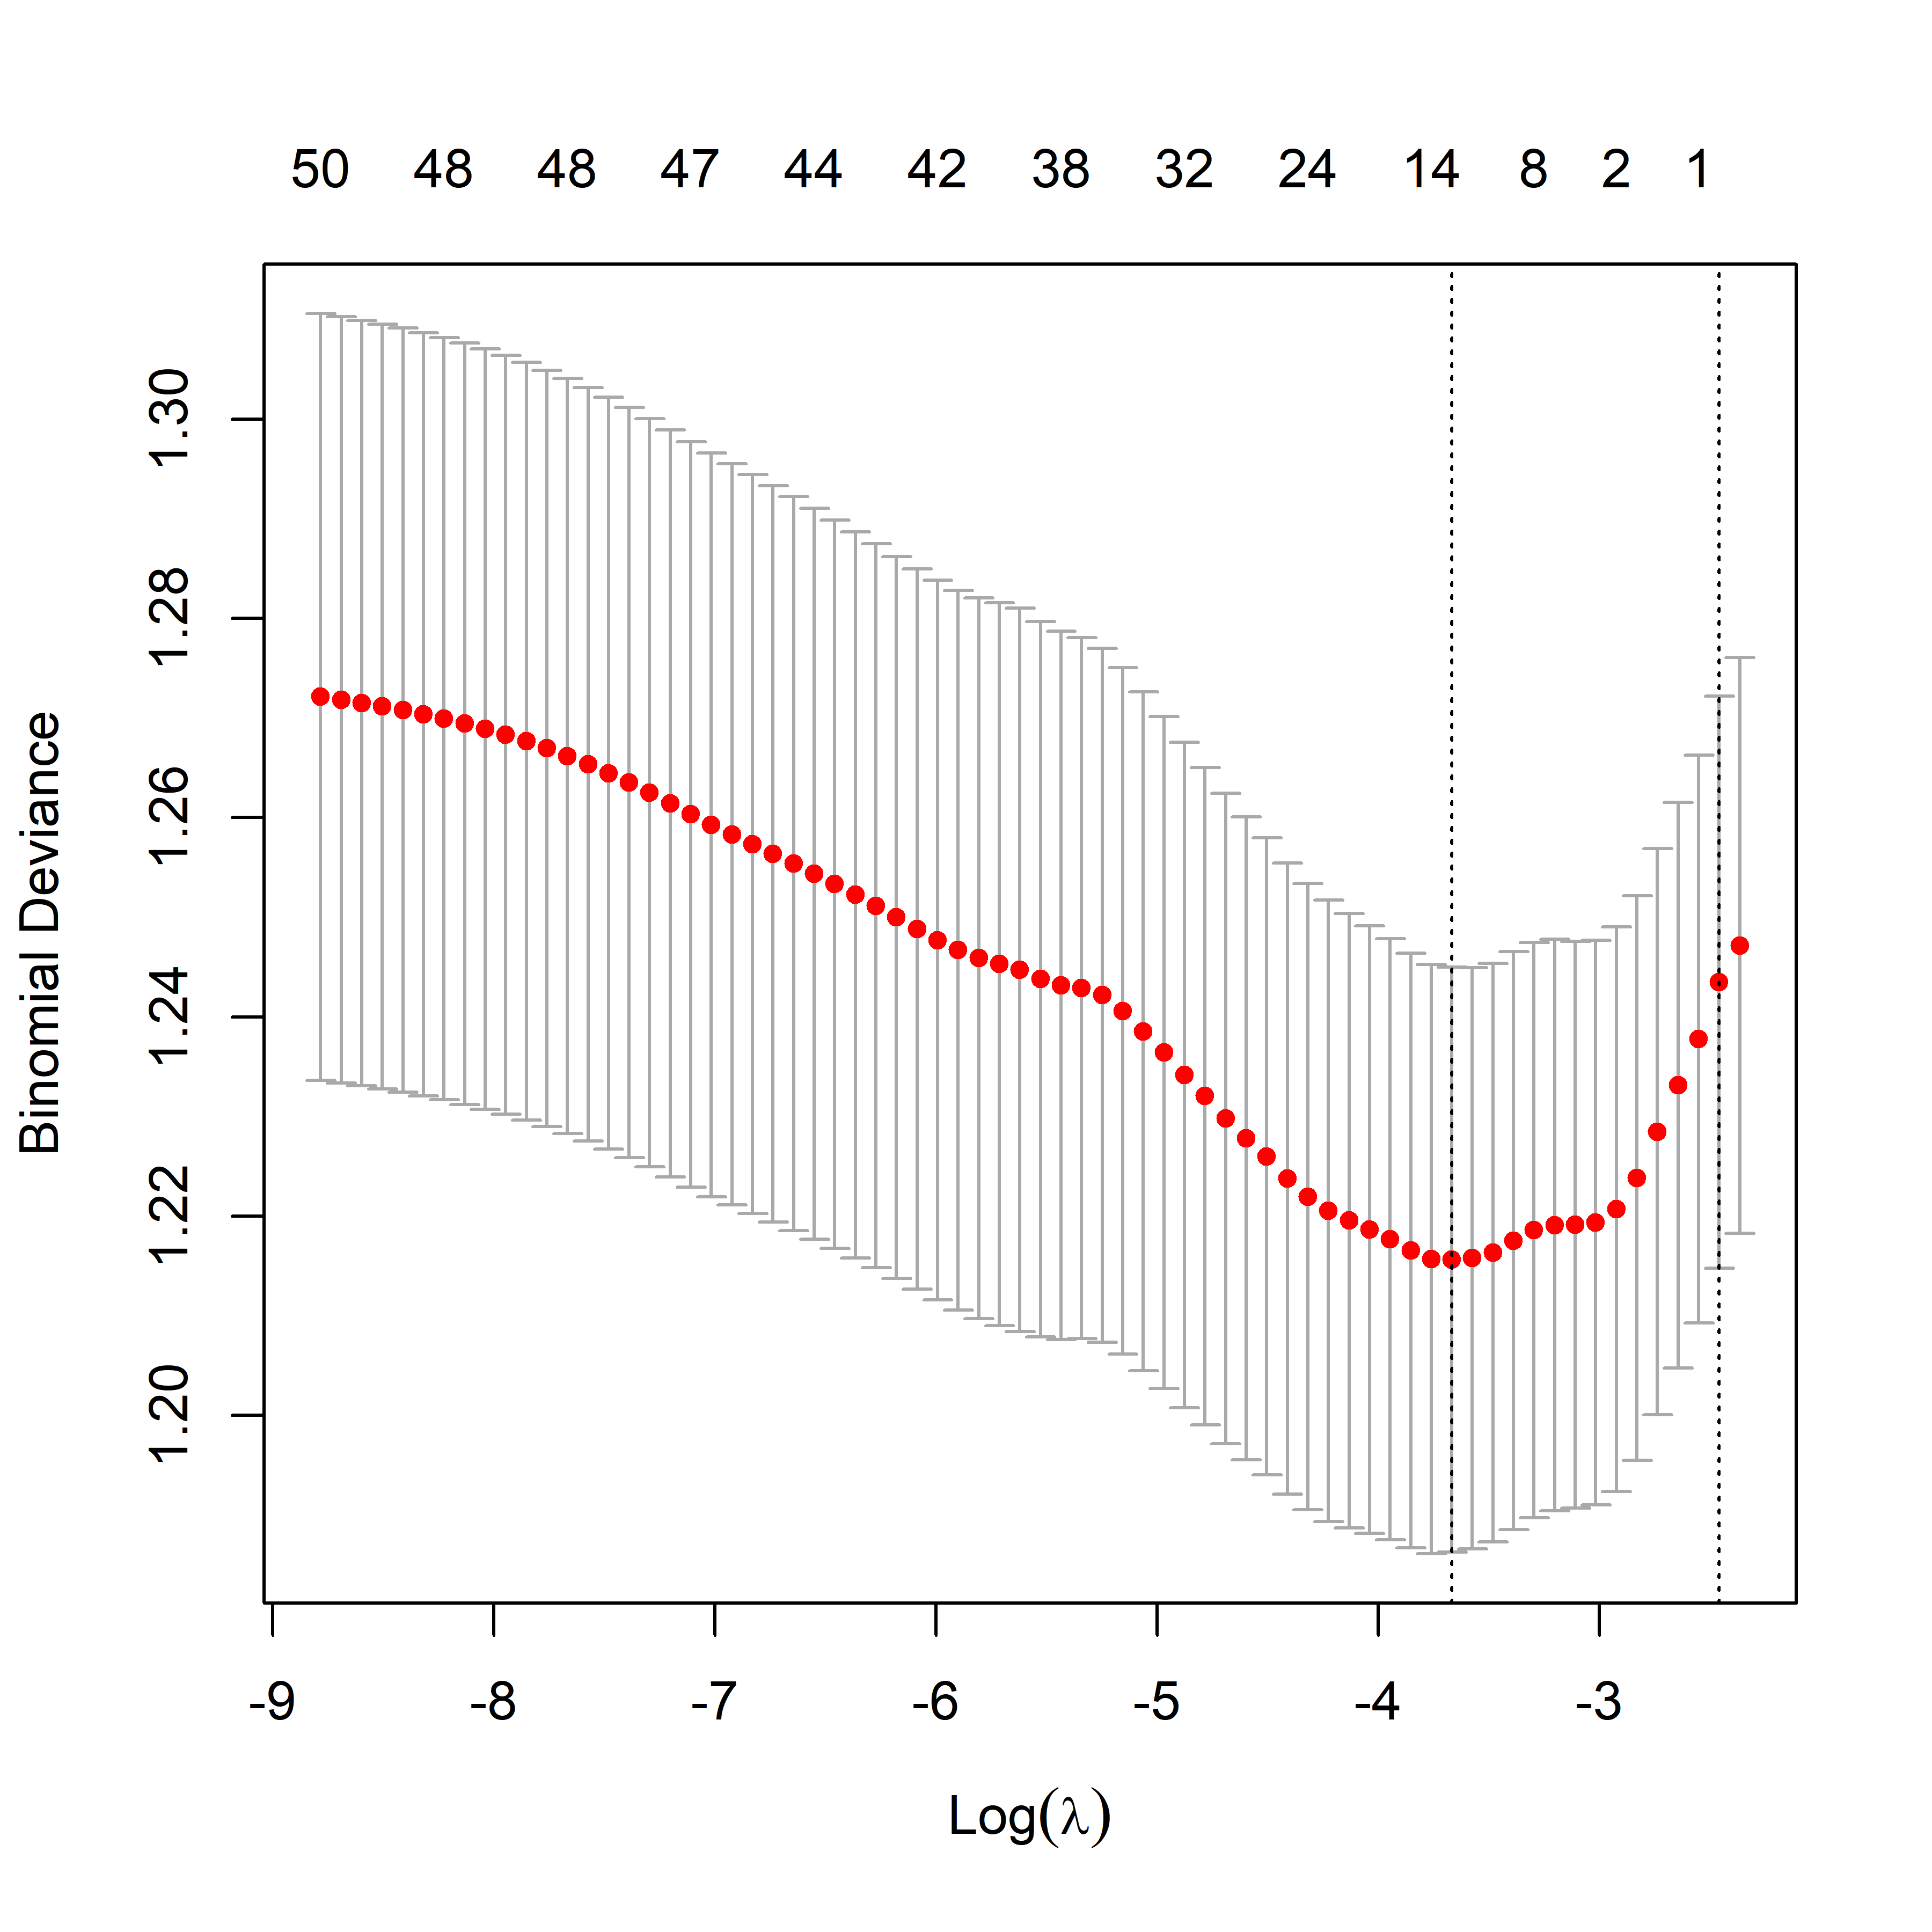


**Figure S1-1.** Cross-validation plot for the regularization parameter (λ) of the current dataset. Tuning parameter (λ) selection in the LASSO model used a 20-fold cross-validation via minimum binomial deviance criteria. The dotted vertical lines indicate the optimal values selected by the minimum deviance and the 1 standard error of the minimum deviance (1-SE criterion).


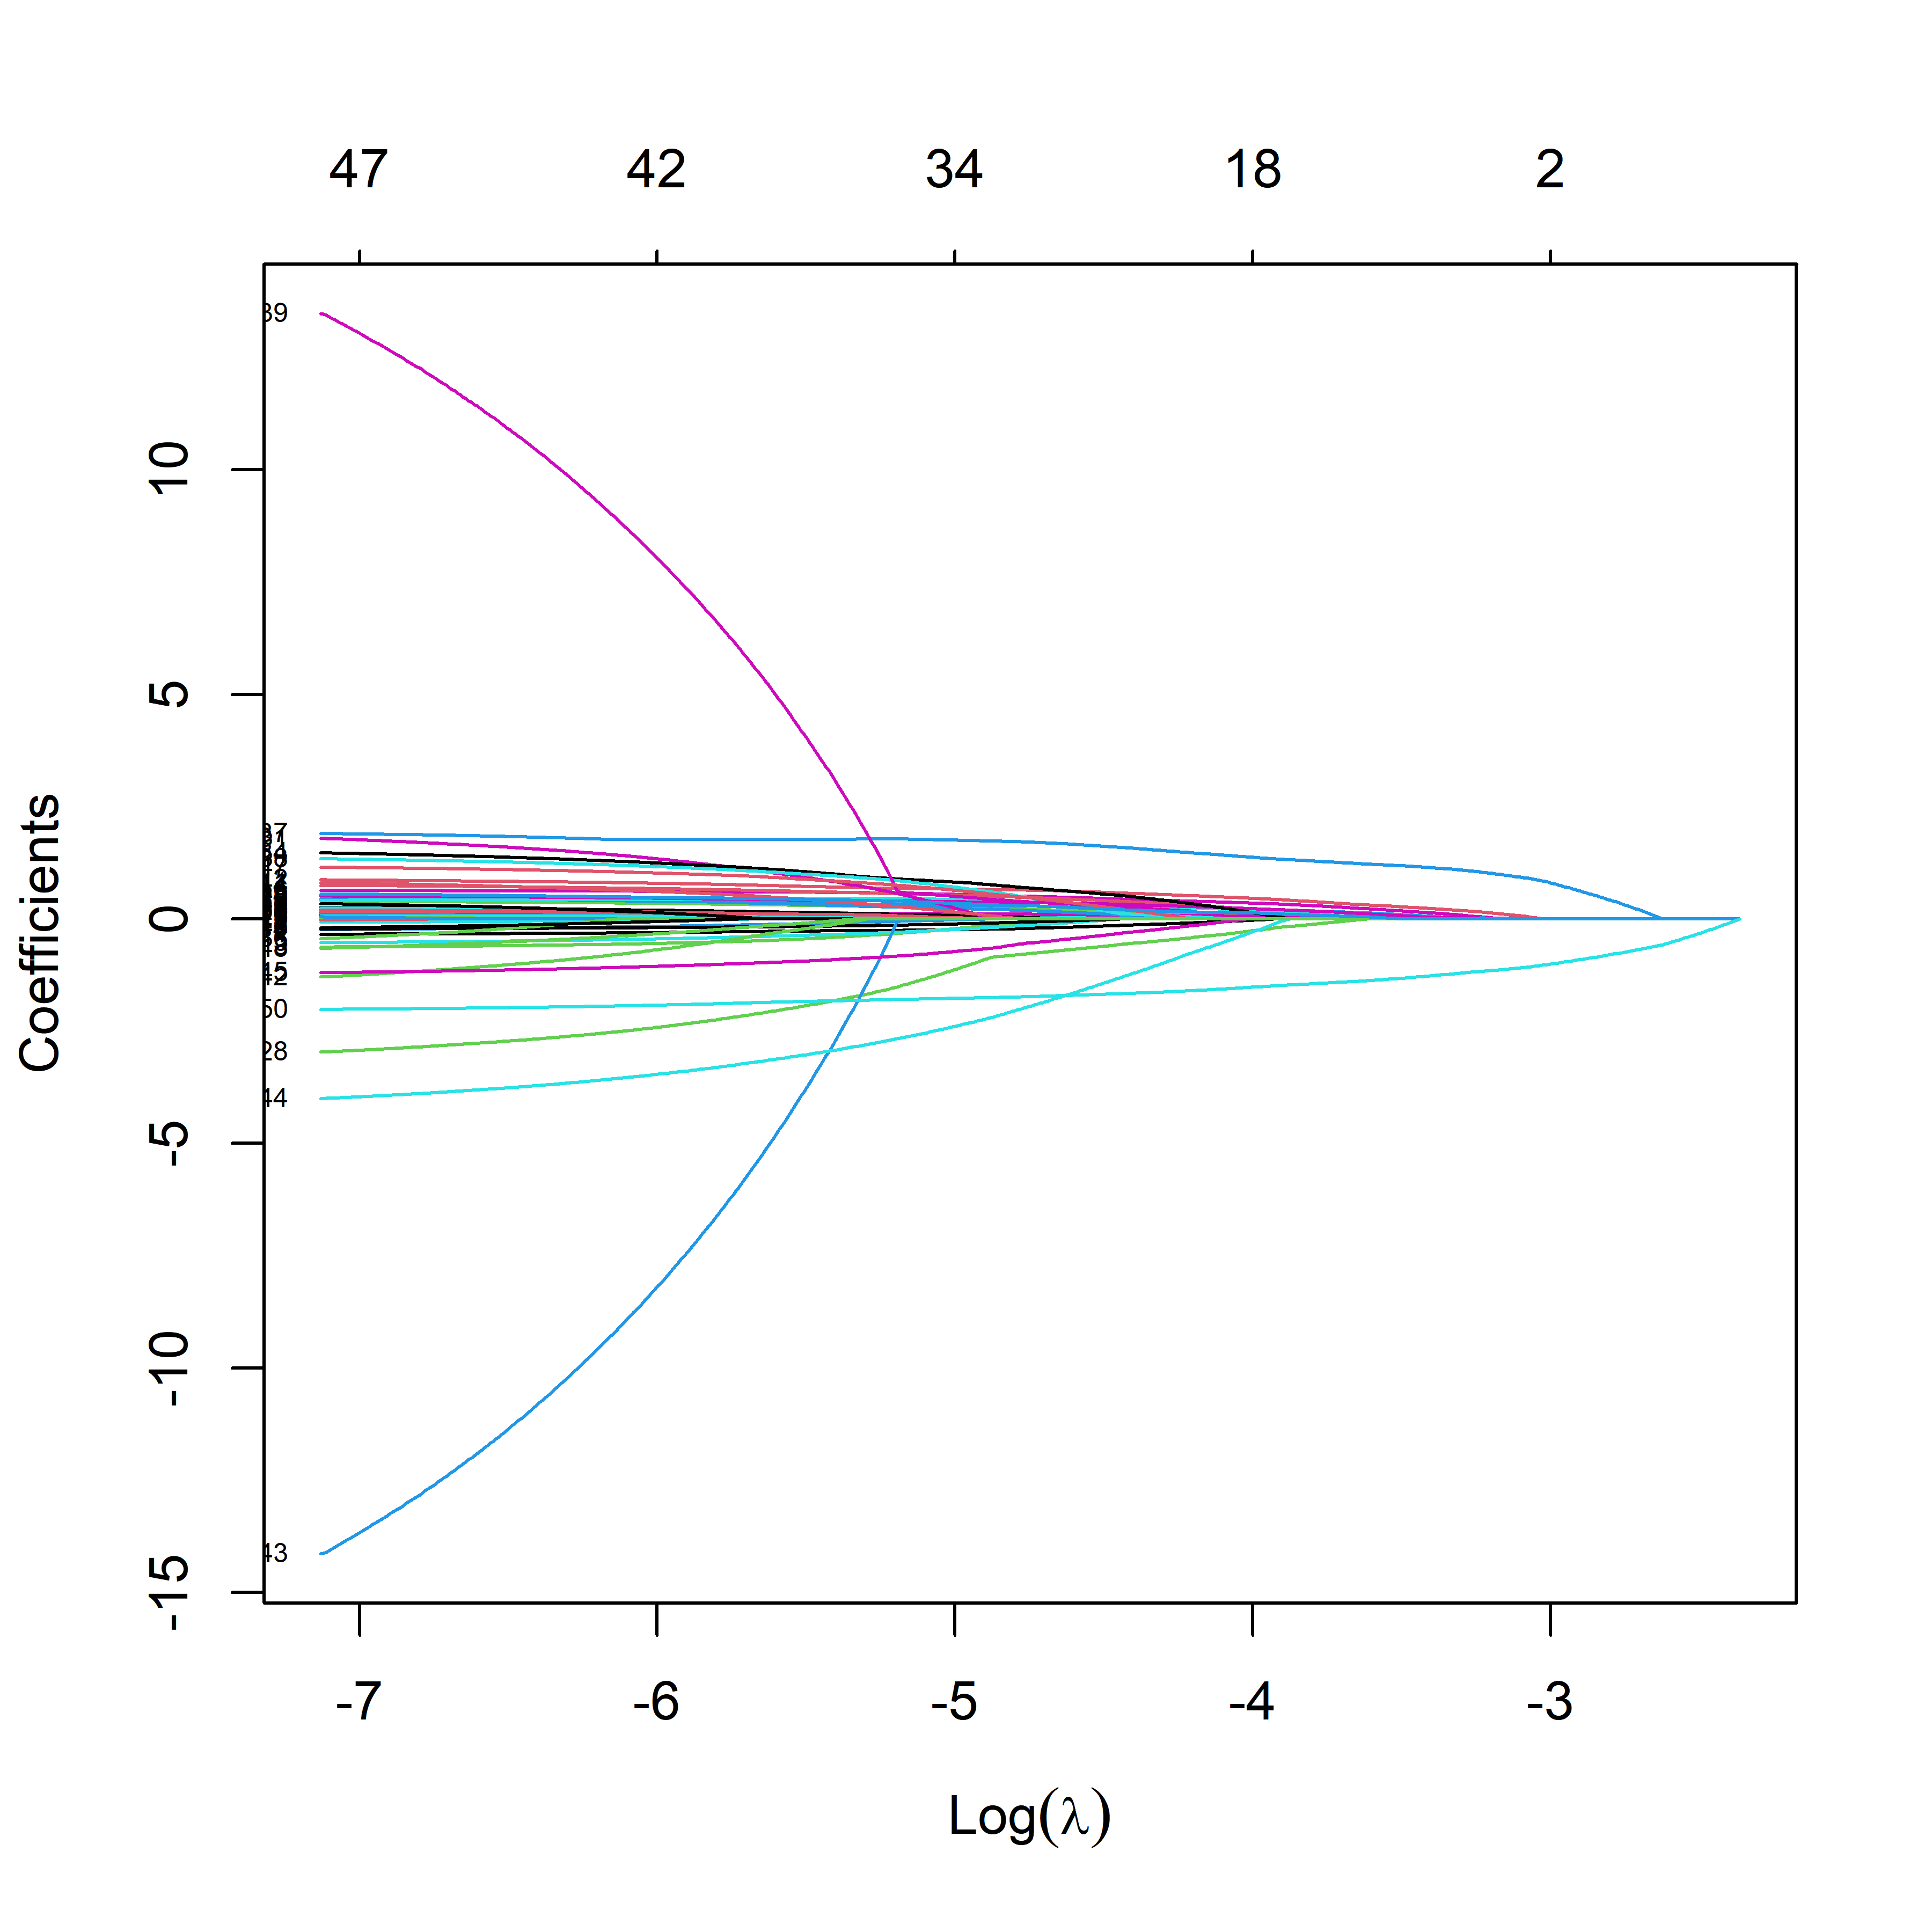


**Figure S1-2.** Plots for LASSO regression coefficients over different values of the penalty parameter (λ).


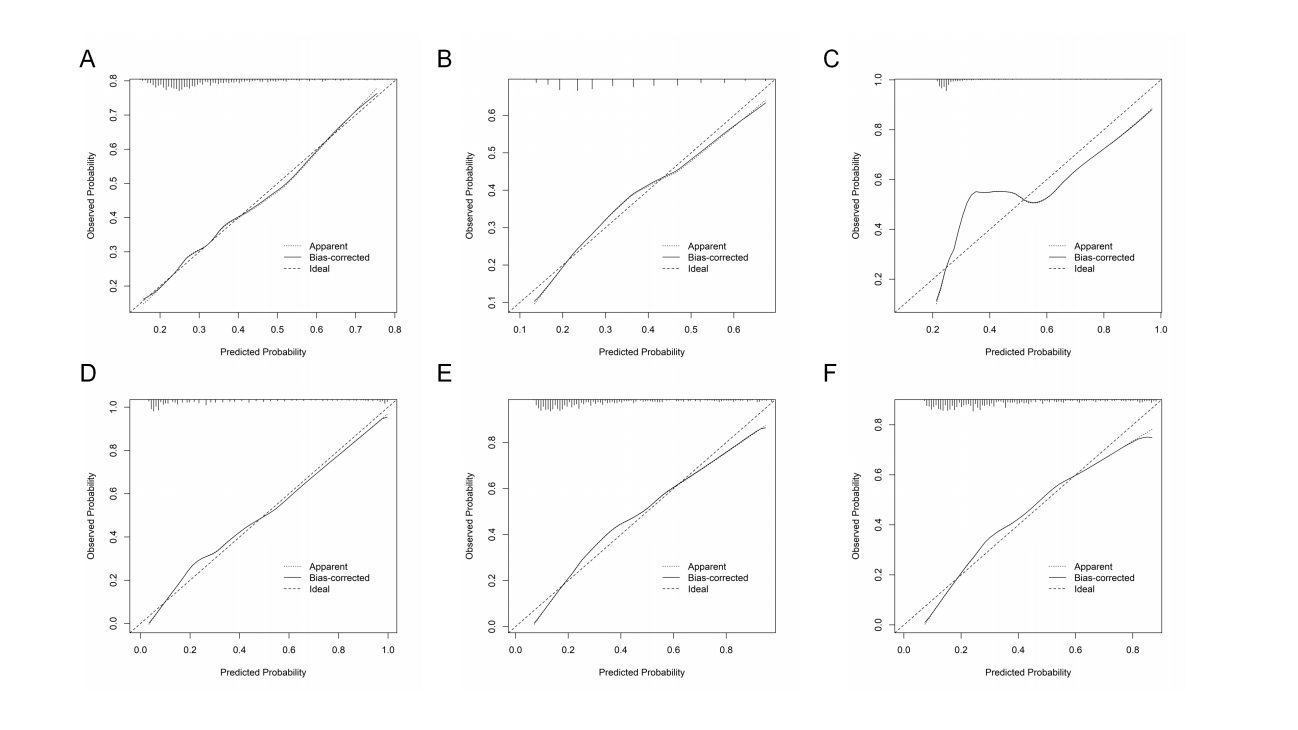


**Figure S2-1.** Calibration plots of logistic regression (A), k-nearest neighbors (B), support vector machine (C) , random forest (D), gradient boosting machine (E) and light gradient boosting machine (F) prediction models for predicting 5-year major adverse cardiovascular events (MACE) in patients with coronary artery disease in the training cohort. The y-axis represents the actual 5-year MACE rate. The x-axis represents the predicted 5-year MACE risk. The diagonal dotted line represents a perfect prediction by an ideal model. The black solid line represents the performance of the prediction models, of which a closer fit to the diagonal dotted line represents a better prediction.


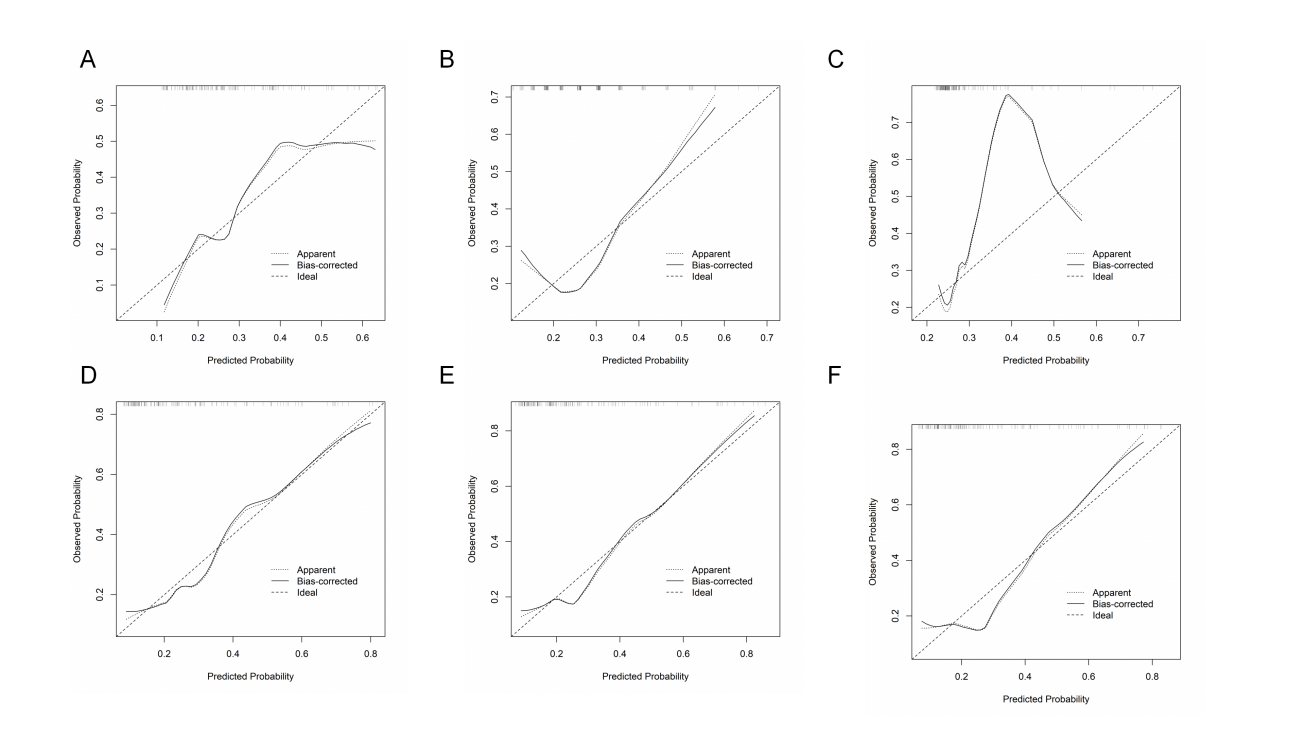


**Figure S2-2.** Calibration plots of logistic regression (A), k-nearest neighbors (B), support vector machine (C) , random forest (D), gradient boosting machine (E) and light gradient boosting machine (F) prediction models for predicting 5-year major adverse cardiovascular events (MACE) in patients with coronary artery disease in the validation cohort. The y-axis represents the actual 5-year MACE rate. The x-axis represents the predicted 5-year MACE risk. The diagonal dotted line represents a perfect prediction by an ideal model. The black solid line represents the performance of the prediction models, of which a closer fit to the diagonal dotted line represents a better prediction.

**Table S1.** Details of variables studied in the present study.

| **Variables** | **Measurement** | **Description** | **Percentage of missing data (n=705) (%)** |
| --- | --- | --- | --- |
| demographic and lifestyle factors | | | |
| Age | Continuous |  | None |
| Sex | Categorical | 0: Female, 1: Male | None |
| Body mass index | Continuous |  | 2.7(19) |
| Marriage | Categorical | 0: Divorced or Widowed or Single, 1: Married | None |
| Education | Categorical | 0: Less than 6 years, 1: 7–9 years, 2: 10–12 years, 3: More than 12 years | 3.26(23) |
| Sleep qualitya | Categorical | 0: Good, 1: Fair, 2: Poor, 3: Very poor | None |
| Smoking status | Categorical | 0: Never, 1: Previous/current | 24.82(175) |
| psychological factors | | | |
| Depressive symptomsb | Categorical | 0: No, 1: Yes | None |
| Anxiety symptomsc | Categorical | 0: No, 1: Yes | None |
| clinical history and comorbidities | | | |
| CAD durationd | Continuous |  | None |
| NYHA | Categorical | 0: Class I, 1: Class II, 2: Class III, 3: Class III-IV | None |
| Hypertension | Categorical | 0: No, 1: Yes | 0.28(2) |
| DM | Categorical | 0: No, 1: Yes | 0.28(2) |
| Stroke | Categorical | 0: No, 1: Yes | 20.57(145) |
| medication and intervention history | | | |
| Aspirin | Categorical | 0: No, 1: Yes | None |
| Clopidogrel or Ticagrelor | Categorical | 0: No, 1: Yes | None |
| Anticoagulants | Categorical | 0: No, 1: Yes | None |
| Statin | Categorical | 0: No, 1: Yes | None |
| βBlocker | Categorical | 0: No, 1: Yes | None |
| ACEI or ARB | Categorical | 0: No, 1: Yes | None |
| Nitrates | Categorical | 0: No, 1: Yes | None |
| CCB | Categorical | 0: No, 1: Yes | None |
| imaging and laboratory findings | | | |
| Previous PCIe | Categorical | 0: Never, 1: One stent, 2: Two stents, 3: Three or more stents | None |
| Number of diseased vesselsf | Categorical | 0: No vessel, 1: Single vessel, 2: Two vessels, 3: Three or more vessels | None |
| Left main CADg | Categorical | 0: No, 1: Yes | None |
| HbA1c | Continuous |  | 0.99(7) |
| Fast glucose | Continuous |  | 1.56(11) |
| CREA | Continuous |  | None |
| BUN | Continuous |  | None |
| TC | Continuous |  | 0.71(5) |
| HDLC | Continuous |  | 0.71(5) |
| LDLC | Continuous |  | 0.71(5) |
| TG | Continuous |  | 0.71(5) |
| apoA | Continuous |  | 3.12(22) |
| apoB | Continuous |  | 3.12(22) |
| Lpa | Continuous |  | 3.12(22) |
| FT3 | Continuous |  | 1.13(8) |
| FT4 | Continuous |  | 1.13(8) |
| TSH | Continuous |  | 0.99(7) |
| CK | Continuous |  | 0.71(5) |
| CKMB | Continuous |  | 0.71(5) |
| ProBNP | Continuous |  | 16.45(116) |
| PT | Continuous |  | 0.99(7) |
| APTT | Continuous |  | 0.99(7) |
| FIB | Continuous |  | 0.99(7) |
| TT | Continuous |  | 0.99(7) |
| INR | Continuous |  | 1.13(8) |
| DDI | Continuous |  | 2.41(17) |
| hs-CRP | Continuous |  | 20.57(145) |
| EF | Continuous |  | 11.35(80) |

Abbreviations: CAD, coronary artery disease; NYHA, New York Heart Association functional classification; ACEI, angiotensin-converting enzyme inhibitor; ARB, angiotensin receptor blocker; CCB, calcium channel blocker; PCI, percutaneous coronary intervention; HbA1c, glycated hemoglobin A1c; Fast glucose, fasting blood glucose; CREA, creatinine; BUN, blood urea nitrogen; TC, total cholesterol; HDL-C, high density lipoprotein cholesterol; LDL-C, low density lipoprotein cholesterol; TG, triglyceride; ApoA, apolipoprotein A1; ApoB, apolipoprotein B; Lpa, lipoprotein(a); FT3, free triiodothyronine; FT4, free thyroxine; TSH, thyroid-stimulating hormone; CK, creatine kinase; CKMB, creatine kinase MB isoenzyme; NT-proBNP, N-terminal pro-brain natriuretic peptide; PT, prothrombin time; APTT, activated partial thromboplastin time; FIB, fibrinogen; TT, thrombin time; INR, international normalized ratio; hs-CRP, high sensitivity C-reactive protein; LVEF, left ventricular ejection fraction.

aSleep quality was self-reported and categorized as 0 (good), 1 (fair), 2 (poor), or 3 (very poor).

b,cDepressive symptoms and anxiety symptoms were assessed using the Patient Health Questionnaire-9 (PHQ-9) and Generalized Anxiety Disorder-7 (GAD-7), respectively, with scores >9 indicating the presence of symptoms.

dCAD duration was defined as the time interval from the first diagnosis of coronary artery disease to the date of follow-up completion, measured in months as a continuous variable.

ePrevious PCI referred to the number of coronary stents implanted prior to the index hospitalization, and was treated as a continuous variable in the analysis.

fNumber of diseased vessels was determined based on coronary angiography findings, and represented the count of major coronary arteries with ≥50% luminal stenosis.

gLeft main CAD was defined as the presence of ≥50% diameter stenosis in the left main coronary artery based on angiographic assessment.

**Table S2.** Characteristics of training cohort and validation cohort. (n = 705)

| **Predictors** |  | **Training cohort**  **(n = 564)** | **Validation cohort**  **(n =141)** | ***x2/t* a** | ***p*- value** |
| --- | --- | --- | --- | --- | --- |
| Age, Mean±SD | | 63.27±10.37 | 62.68±10.7 | 0.59 | 0.554 |
| Sex, n(%) | Female | 150(27) | 44(31) | 0.98 | 0.322 |
| Male | 414(73) | 97(69) |
| Body mass index(kg/m2), Mean±SD | | 24.3±3.25 | 24.97±3.3 | -2.17 | 0.031* |
| Marriage, n(%) | Divorced or Widowed or Single | 35(6) | 6(4) | 0.47 | 0.494 |
| Married | 529(94) | 135(96) |
| Education, n(%) | Less than 6 years | 164(29) | 42(30) | 0.28 | 0.964 |
| 7–9 years | 164(29) | 39(28) |
| 10–12 years | 115(20) | 31(22) |
| More than 12 years | 121(21) | 29(21) |
| Sleep quality, n(%) | Good | 121(21) | 33(23) | 0.31 | 0.957 |
| Fair | 226(40) | 54(38) |
| Poor | 138(24) | 35 (25) |
| Very poor | 79(14) | 19(13) |
| Smoking status, n(%) | Never | 316(56) | 75(53) | 0.26 | 0.609 |
| Previous/current | 248(44) | 66(47) |
| Depressive symptoms, n(%) | No | 480(85) | 131(93) | 5.29 | 0.022* |
| Yes | 84(15) | 10(7) |
| Anxiety symptoms, n(%) | No | 524(93) | 129(91) | 0.16 | 0.692 |
| Yes | 40(7) | 12(9) |
| CAD duration(mouth), Mean±SD | | 34.18±49.85 | 33.05±49.98 | 0.24 | 0.811 |
| NYHA, n(%) | Class I | 196(35) | 58(41) | 5.94 | 0.115 |
| Class II | 291(52) | 64(45) |
| Class III | 57(10) | 18(13) |
| Class III-IV | 20(4) | 1(1) |
| Medical history | | | | | |
| Hypertension, n(%) | No | 229(41) | 60(43) | 0.11 | 0.745 |
| Yes | 335(59) | 81(57) |
| Diabetes mellitus, n(%) | No | 379(67) | 103(73) | 1.53 | 0.217 |
| Yes | 185(33) | 38(27) |
| Stroke | No | 525(93) | 137(97) | 2.6 | 0.107 |
| Yes | 39(7) | 4(3) |
| Medication use | | | | | |
| Aspirin,n(%) | No | 101(18) | 19(13) | 1.27 | 0.260 |
| Yes | 463(82) | 122(87) |
| Clopidogrel or Ticagrelor,n(%) | No | 132(23) | 34(24) | 0 | 0.947 |
| Yes | 432(77) | 107(76) |
| Anticoagulants,n(%) | No | 535(95) | 133(94) | 0 | 0.966 |
| Yes | 29(5) | 8(6) |
| Statin, n(%) | No | 53(9) | 8(6) | 1.54 | 0.215 |
| Yes | 511(91) | 133(94) |
| βBlocker, n(%) | No | 102(18) | 27(19) | 0.03 | 0.865 |
| Yes | 462(82) | 114(81) |
| ACEI or ARB, n(%) | No | 175(31) | 47(33) | 0.18 | 0.670 |
| Yes | 389(69) | 94(67) |
| Nitrates, n(%) | No | 497(88) | 122(87) | 0.14 | 0.708 |
| Yes | 67(12) | 19(13) |
| CCB, n(%) | No | 432(77) | 112(79) | 0.37 | 0.545 |
| Yes | 132(23) | 29(21) |
| Previous PCI, n(%) | Never | 398(71) | 107(76) | 4.46 | 0.216 |
| One stent | 68(12) | 19(13) |
| Two stents | 52(9) | 6(4) |
| Three or more stents | 46(8) | 9(6) |
| Number of diseased vessels, n(%) | No vessel | 97(17) | 22(16) | 0.42 | 0.935 |
| Single vessel | 98(17) | 26(18) |
| Two vessels | 103(18) | 28(20) |
| Three or more vessels | 266(47) | 65(46) |
| Left main CAD, n(%) | No | 465(82) | 110(78) | 1.19 | 0.275 |
| Yes | 99(18) | 31(22) |
| HbA1c(%), Mean±SD | | 6.61±1.47 | 6.53±1.54 | 0.49 | 0.622 |
| Fast glucose(mmol/L), Mean±SD | | 6.41±2.77 | 6.39±2.79 | 0.08 | 0.936 |
| CREA(µmol/L), Mean±SD | | 99.34±48.72 | 94.1±25.58 | 1.76 | 0.079 |
| BUN(mmol/L), Mean±SD | | 6.47±2.77 | 6.53±2.36 | -0.23 | 0.818 |
| TC(mmol/L), Mean±SD | | 4.38±1.28 | 4.61±1.29 | -1.89 | 0.060 |
| HDL-C(mmol/L), Mean±SD | | 0.98±0.23 | 1.02±0.25 | -1.94 | 0.053 |
| LDL-C(mmol/L), Mean±SD | | 2.84±0.89 | 3±0.94 | -1.76 | 0.080 |
| TG(mmol/L), Mean±SD | | 1.75±1.62 | 1.74±1.39 | 0.08 | 0.939 |
| ApoA(g/L), Mean±SD | | 1.13±0.18 | 1.16±0.17 | -1.28 | 0.203 |
| ApoB(g/L), Mean ± SD | | 0.9±0.26 | 0.95±0.28 | -1.93 | 0.055 |
| Lpa(nmol/L), Mean ± SD | | 305.06±359.28 | 316.46±373.31 | -0.33 | 0.744 |
| FT3(pmol/L), Mean ± SD | | 4.82±0.82 | 4.86±0.8 | -0.57 | 0.573 |
| FT4(pmol/L), Mean ± SD | | 12.87±10.48 | 12.38±10.64 | 0.5 | 0.620 |
| TSH(mIU/L), Mean ± SD | | 1.86±3.03 | 1.99±3.13 | -0.42 | 0.673 |
| CK(U/L), Mean ± SD | | 119.24±115.79 | 120.96±117.81 | -0.16 | 0.876 |
| CKMB(U/L), Mean ± SD | | 12.13±8 | 12.12±8.11 | 0.01 | 0.996 |
| NT-proBNP(ng/L), Mean ± SD | | 999.43±2536.08 | 964.07±2994.51 | 0.13 | 0.897 |
| PT(s), Mean ± SD | | 13.73±1.17 | 13.66±1.17 | 0.6 | 0.547 |
| APTT(s), Mean ± SD | | 38.19±4.55 | 37.29±3.68 | 2.46 | 0.015 |
| FIB(g/L), Mean ± SD | | 3.96±1.11 | 4.08±1.13 | -1.13 | 0.261 |
| TT(s), Mean ± SD | | 17.41±9.11 | 16.75±1.49 | 1.64 | 0.101 |
| INR, Mean ± SD | | 1.05±0.12 | 1.04±0.12 | 0.76 | 0.448 |
| D-dimer(µg/mL), Mean ± SD | | 690.75±917.84 | 612.59±496.09 | 1.37 | 0.170 |
| hs-CRP(mg/L), Mean ± SD | | 9.15±17.29 | 7.12±10.33 | 1.79 | 0.075 |
| LVEF(%), Mean ± SD | | 58.19±11.25 | 58.22±11.44 | -0.03 | 0.974 |

Abbreviations: CAD, coronary artery disease; NYHA, New York Heart Association functional classification; ACEI, angiotensin-converting enzyme inhibitor; ARB, angiotensin receptor blocker; CCB, calcium channel blocker; PCI, percutaneous coronary intervention; HbA1c, glycated hemoglobin A1c; Fast glucose, fasting blood glucose; CREA, creatinine; BUN, blood urea nitrogen; TC, total cholesterol; HDL-C, high density lipoprotein cholesterol; LDL-C, low density lipoprotein cholesterol; TG, triglyceride; ApoA, apolipoprotein A1; ApoB, apolipoprotein B; Lpa, lipoprotein(a); FT3, free triiodothyronine; FT4, free thyroxine; TSH, thyroid-stimulating hormone; CK, creatine kinase; CKMB, creatine kinase MB isoenzyme; NT-proBNP, N-terminal pro-brain natriuretic peptide; PT, prothrombin time; APTT, activated partial thromboplastin time; FIB, fibrinogen; TT, thrombin time; INR, international normalized ratio; hs-CRP, high sensitivity C-reactive protein; LVEF, left ventricular ejection fraction.

a The comparative analyses for continuous variables and categorical variables were conducted using Student’s t test and Chi-square test, respectively.

* *p* < 0.05
